# Supplementary material for: The interplay between the polar growth determinant DivIVA, the segregation protein ParA, and their novel interaction partner PapM controls the Mycobacterium smegmatis cell cycle by modulation of DivIVA subcellular distribution
Source: PubMed Central journal article supplement (PMC10714820; doi:10.1128/spectrum.01752-23), 2023-11-15
Supplement: spectrum.01752-23-s0002.pdf [file spectrum.01752-23-s0002.pdf]

## Matusiak I. et al. supplemental material

### Supplemental methods

#### BTH library construction, screening and interaction verification

For BTH library construction chromosomal DNA was isolated from the *M. smegmatis* mc2 155 strain cultured on solid NB medium for 2 days. 50 µg of chromosomal DNA was sonicated in aliquots to deliver fragments with length of 500 to 1500 bp (as verified by gel electrophoresis). After sonication, aliquots of DNA were pooled and then the ends of the resulting fragments were filled with DNA T4 polymerase and Klenow DNA polymerase I fragment and next phosphorylated with T4 polynucleotide kinase (PNK). After the reaction, the DNA was purified by preparative electrophoresis in a 1% agarose gel, the fragments within the size range of 600-1500 bp were excised and isolated with the QIAquick Gel Extraction Kit (Qiagen). The pKT25 vector used to construct the library was digested with the restriction enzyme SmaI (for 3 days, gradually increasing the amount of enzyme). Then DNA was precipitated and dephosphorylated and used for ligation with the obtained insert, followed by transformation of *E. coli* TOP10 competent cells. Transformants were selected on LB medium supplemented with kanamycin. Process of ligation and transformation were optimized and adjusted to ultimately obtain about 400 colonies on a single one plate. Altogether 11 ligations performed and 22 transformations delivered total of 38 000 colonies. Colonies were harvested from the obtained plates and plasmid DNA was isolated using the Qiagen Plasmid Maxi Kit (Qiagen). Finally, 1.5 ml of pKT25lib<sub>MS</sub> DNA at concentration 480 ng/µl was obtained.

To screen the BTH library, the electrocompetent cells of *E. coli* BTH101 strain containing pUT18*parA* were transformed with pKT25lib<sub>MS</sub> plasmid DNA. Transformation mixture was plated on LB medium supplemented with 0.004% X-gal, 50 µg/ml kanamycin, 100 µg/ml ampicillin, and 0.5 mM isopropyl-β-D-1-thiogalactopyranoside (IPTG). The dilutions of the pKT25lib<sub>MS</sub> library for transformation and the amount of transformation mixture were optimized to obtain approximately 300 colonies per plate and in total of 42 000 colonies. The plates were incubated for 48 hours at 30° and the transformants were screened for the blue colonies indicating the interactions of a protein fragment with the ParA protein. During the pre-selection 270 clones were re-streaked to confirm positive result. Next, plasmid DNA from 40 positive clones was isolated and presence of the insert in library clones was tested by PCR (with pKT25Fw i pKT25Rv primers). Obtained plasmid DNA was next used for retransformation with pUT18*parA* and to exclude false negatives, with pUT18C. The positive clones were sequenced.

Next, the whole *msmeg\_5597* was cloned to pUT18C and pKT25 BTH vectors. For PCR amplification of *M. smegmatis papM* gene MSMEG\_5597\_XbaI\_BamHI\_Fw and MSMEG\_5597\_KpnI\_EcoRI\_Rv primers were used *M. smegmatis* mc<sup>2</sup> 155 chromosomal DNA as the

template. The PCR product and vectors: pUT18C and pKT25 were cut by XbaI and KpnI restriction enzymes and ligated. The ligation mixtures were used for transformation of DH5 $\alpha$  cells. The obtained clones were verified using PCR, enzyme digestion and sequencing.

To analyse the interaction between the studied proteins in the BTH system, pUT18C and pKT25 derivatives with analysed genes were transformed into *E. coli* BTH101 and plated on LB containing with ampicillin, kanamycin, X-gal and IPTG. After 2 days of incubation at 30°C, the selected representative transformants were re-streaked on LB containing X-gal, kanamycin, ampicillin, and IPTG.

### **Constructs for *E. coli* colocalization**

pETDuet-*pknB*<sub>KD</sub> was constructed by amplifying the fragment of *M. smegmatis pknB* gene with PknB\_Ms\_Fw\_HindIII and PknB\_Ms\_Rv\_EcoRI primers and the *M. smegmatis* mc<sup>2</sup> 155 chromosomal DNA as the template. PCR product and pETDuet-1 vector were digested with HindIII and EcoRI restriction enzymes and ligated.

To obtain pETDuet-1 derivatives with *mcherry-divIVA* or *pknB*<sub>KD</sub> and *mcherry-divIVA*, the *ics-mcherry-divIVA* gene was PCR amplified with pJP108*divIVA* as a template and Cherry\_Fw\_Nde and Div\_revSnaBI primers. The PCR product was digested with NdeI and SnaBI enzymes and ligated into pETDuet-1 or pETDuet-*pknB*<sub>KD</sub> vectors digested with NdeI and EcoRV, yielding pETDuet-*mcherry-divIVA* or pETDuet-*pknB*<sub>KD</sub> *mcherry-divIVA* respectively.

To construct pETDuet-*mcherry-divIVAT74A* with the T74A substitution, the *mcherry-divIVA* gene was amplified in two fragments using two sets of primers: Cherry\_Fw\_Nde and DivIVA\_Ms\_Ala\_Rv as well as DivIVA\_Ms\_Ala\_Fw and Div\_revSnaBI, with pETDuet-*pknB*<sub>KD</sub> *mcherry-divIVA* as the template. The resulting PCR products were then combined and used as the template in an overlapping PCR reaction using Cherry\_Fw\_Nde and Div\_revSnaBI primers. The obtained product was subsequently digested with NdeI and SnaBI enzymes, and then ligated into pETDuet-*pknB*<sub>KD</sub> vector that had been previously digested with NdeI and EcoRV, yielding the final construct, pETDuet-*pknB*<sub>KD</sub> *mcherry-divIVAT74A*.

To construct pETDuet-*ics-mcherry*, *icsA-mcherry* gene was PCR amplified with pJP108*divIVA* as a template and Ics\_Fw\_NdeI and Cherry\_rvSnaBI primers. The PCR product was digested with NdeI and SnaBI enzymes and ligated into pETDuet-1 vector digested with NdeI and EcoRV.

To construct pACYC-*papM-mT2*, first *papM* gene was amplified using 5597\_Fw\_NcoI and 5597\_linker\_Rv primers and the *M. smegmatis* mc<sup>2</sup> 155 chromosomal DNA as a template. *mTurquoise2* gene was amplified using mT2\_Fw and mt2\_Rv\_EcoRI primers and p2Nil-*Isr2-mT2* as a template. To

linearized the vector, the pACYC-Duet-1 vector was digested with NcoI and EcoRI restriction enzymes. The PCR products were assembled into the pACYC-Duet-1 vector using Gibson Assembly Kit (NEB) (xxx).

To construct pACYC derivatives containing *papM-mT2* and *egfp-parA*, the *egfp-parA* gene was excised from pACYC-*egfp-parA* vector with NdeI and PacI restriction enzymes and cloned into pACYC-*papM-mT2* vector digested with the same enzymes.

All the obtained constructs were analysed by PCR, restrictive digestion and sequencing.

### **Preparation of *E. coli* constructs for protein overproduction and purification**

The pET28a*papM* construct was prepared by excision of the *papM* gene from the pKT25*papM* construct with BamHI and EcoRI enzymes and ligation into the pET28a $\Phi$  vector cut with the same enzymes. The ligation mixtures were used for transformation of DH5 $\alpha$  cells. The obtained transformants were verified by PCR reaction using MSMEG\_5597Fw and MSMEG\_5597Rv primers and digestion with the SacI and BamHI restriction enzymes. The obtained, positive clones were transformed into BL21 (DE3) *E. coli* cells.

### **PapM protein purification**

The *M. smegmatis* ParA protein was purified as an N-terminally GST-tagged protein using a GST-fusion purification system (GE Healthcare) as described earlier (Pióro 2022). MSMEG\_5597 (PapM) protein was purified as a C-terminal His-tagged fusion protein using nickel-affinity chromatography. Briefly, cells from a 0.8 l culture were lysed by sonication in 50 ml of PBS supplemented with 10 mM imidazole. The obtained lysate was clarified by centrifugation (15 000 g, 15 min, 4 °C) and incubated (at 4 °C, overnight) with a 1 ml bed volume of Ni-NTA agarose resin (Qiagen). Next, the resin was washed three times with PBS supplemented with 50 mM imidazole, and bound proteins were eluted with PBS supplemented with 500 mM imidazole.

### **Western blotting analysis**

For Western blot analysis was used 10  $\mu$ g of lysate for each analyzed *E. coli* strain. Proteins were separated by SDS-PAGE electrophoresis. After electrophoresis, proteins were transferred to a nitrocellulose membrane (Millipore), which was blocked for 1 hour with 3% (wt/vol) BSA in TBST buffer (TBS with 0.05% Tween 20). The membrane was washed with TBST buffer, incubated with agitation for 1 hour at room temperature with anti-[p]threonine antibody rabbit monoclonal (diluted 1:500; Sigma-Aldrich), or anti His- antibody (diluted 1:1000; ThermoFisher Scientific) then washed three times with TBST, and incubated with agitation for 1 h at 20°C with goat anti-rabbit IgG conjugated to horseradish peroxidase (1:5000; Santa Cruz Biotechnology). The membrane was washed three times in TBST solution, the proteins were visualized with the SuperSignal West Pico Plus chemiluminescence

substrate (ThermoFisher Scientific), and the results were captured using a ChemiDoc XRS system (Bio-Rad).

### **Electrophoretic mobility shift assay**

The whole plasmid pUC19 (2686 bp) was used for the EMSA (Electrophoretic Mobility Shift Assay) experiment. Protein binding to DNA was carried out in DNA binding buffer (50 mM Tris-HCl pH 7.5, 150 mM NaCl, 10 mM magnesium acetate, 0.02% Tween-20, 5 % [v/v] glycerol, 1mg/ml BSA). Increasing concentrations of His-PapM protein in the range of 0-2 $\mu$ M were incubated (20 minutes, 20°C) with 50 fmol of DNA in a final reaction volume of 20  $\mu$ l. The samples were then analyzed electrophoretically. Electrophoresis was carried out in 0.8% native agarose gel in 1x TBE buffer at 4°C, overnight at a constant voltage of 4-5V/cm. To visualize the DNA, the gel was stained with ethidium bromide.

### ***M. smegmatis* strain construction**

All vectors for *M. smegmatis* transformations were prepared in *E. coli* DH5 $\alpha$ . For construction of *M. smegmatis* mc<sup>2</sup> 155 strain with deletion of *papM* gene p2Nil $\Delta$ *papM* was constructed. The sequence flanking 5' end of *papM* (847 bp) was amplified using Msmeg5597\_F1\_HindIII\_Fw and Msmeg5597\_F1\_BamHI\_Rv primers and cloned into the HindIII/BamHI sites of p2Nil vector to create p2Nil*papMF1*. Next, the region flanking downstream of *papM* 3' (907 bp) was amplified using Msmeg5597\_F2\_BamHI\_Fw and Msmeg5597\_F2\_PacI\_Rv primers and cloned into the BamHI/PacI sites of p2Nil*papMF1*, to yield p2Nil $\Delta$ *papM*. Next, the pGOAL17 cassette was cloned into the PacI site of p2Nil $\Delta$ *papM* to create p2Nil $\Delta$ *papMGOAL*. The obtained vector was used to transform wild-type *M. smegmatis* mc<sup>2</sup> cells, yielding the IM01 ( $\Delta$ *papM*) strain. To construct the strain with double deletion of *parA* and *papM* genes, p2Nil $\Delta$ *papMGOAL* vector was used to transform *M. smegmatis* KG22 ( $\Delta$ *parA*) cells, yielding the IM02 ( $\Delta$ *papM*  $\Delta$ *parA*) mutant strain. For the transformation of electrocompetent *M. smegmatis* cells, the plasmid DNA was treated with NaOH/EDTA (0.2 mM/0.2 mM). Transformants were plated on NB plates and selected for kanamycin resistance. The Kan<sup>R</sup> SCO (single-crossover recombinant) colonies were blue and sensitive to sucrose (2%). The SCO colonies were further plated on NB without selection. Cells were then resuspended in a liquid medium and serial dilutions were plated onto NB plates supplemented with sucrose and X-Gal. The selected double-crossover (DCO) mutants were white, Kan<sup>S</sup> and resistant to sucrose. PCR was used to distinguish between wild-type and DCO mutant cells.

For the construction of *M. smegmatis* complementation and *papM* overexpressing strains derivatives of the mycobacteriophage L5-based integration-proficient vector pMV306<sub>pami</sub> were used. *M. smegmatis* *papM* gene was PCR amplified with the 5597\_pami\_XbaI\_Fw and 5597\_pami\_KpnI\_Rv

primers and the *M. smegmatis* mc<sup>2</sup> 155 chromosomal DNA as a template. PCR products as well as pMV306p<sub>ami</sub>∅ were digested with XbaI and KpnI restriction enzymes and ligated. The obtained construct was verified by PCR, restriction cloning and sequencing. Next, the obtained construct, as well as the control vector pMV306p<sub>ami</sub>∅, were used to transform wild-type, KG22 ( $\Delta parA$ ) (Ginda et al., 2013) and IM02 ( $\Delta papM \Delta parA$ ) strains using the standard protocol, yielding IM12 (wt pMVp<sub>ami</sub>papM), IM11 ( $\Delta parA$ , pMVp<sub>ami</sub>∅), IM13 strains ( $\Delta parA$ , pMVp<sub>ami</sub>papM) and IMPW1 ( $\Delta papM \Delta parA$  pMVp<sub>ami</sub>papM), respectively. Vectors were introduced into *M. smegmatis* competent cells by electroporation and transformants were selected on a medium containing kanamycin (50 µg/ml) and verified by PCR and western blotting.

Derivatives of strain IM02 ( $\Delta papM \Delta parA$ ), producing EGFP-ParA or PAmCherry-ParA were constructed by the introduction of pMVp<sub>nat</sub>egfp-parA plasmid (Ginda et al., 2013) or pMVp<sub>nat</sub>PAmcherry-parA (Pióro et al., 2019), yielding IM14 ( $\Delta papM \Delta parA$  pMVp<sub>nat</sub>egfp-parA) or IM15 ( $\Delta papM \Delta parA$  pMV306p<sub>nat</sub>PAmcherry-parA) strains, respectively. Obtained recombinants were checked by PCR, Western blotting and the production of fluorescent protein fusions was additionally verified by semi-native SDS-PAGE and subsequent detection with Azure 600 Imaging System (Azure Biosystems).

For the construction of the strains producing mCherry-DivIVA in different *M. smegmatis* genetic backgrounds, first, the *mcherry-divIVA* gene was cut out from pETDuet-*mcherry-divIVA* vector with NdeI and PacI restriction enzymes and cloned into pKW08p<sub>tet</sub>∅ vector digested with the same enzymes. The resulting construct was analysed by PCR using pKW08F2 and pKW08RV2 primers, restrictive digestion and sequencing. Next, the obtained construct, pKW08p<sub>tet</sub>mcherry-divIVA, was introduced into wild-type *M. smegmatis* mc<sup>2</sup> 155, IM01( $\Delta papM$ ) and KG22 ( $\Delta parA$ ), yielding IM16 (wt pKW08p<sub>tet</sub>mcherry-divIVA), IM17 ( $\Delta papM$  pKW08p<sub>tet</sub>mcherry-divIVA), IM18 ( $\Delta parA$  pKW08p<sub>tet</sub>mcherry-divIVA) strains respectively. Mutants were analysed by PCR, DNA sequencing and/or Western blotting.

### **RNA isolation, Reverse-Transcription and Quantitative PCR (RT-qPCR)**

For RT-qPCR reaction, RNA was isolated with Trizol LS reagent (Invitrogen) as described previously (Płociński et al., 2019). Briefly, 50 ml of *M. smegmatis* culture was centrifuged at 5,000×g for 10 min at 4°C and next the cells were resuspended in 300 µl of water and lysed by bead-beating with the MP FastPrep system (MP Biomedicals) using the program: 2 × 45 s, 6.0 m/s with 5 min intervals on ice. RNA was purified and treated with DNase I (RapidOut DNA Removal Kit, Invitrogen) according to the manufacturer's protocol. RNA quantity and integrity were checked by electrophoresis using an agarose gel.

A total of 500 ng of RNA was used for cDNA synthesis using the Maxima First Strand cDNA Synthesis Kit (Thermo Fisher Scientific) in a final volume of 20 µl. The original manufacturer protocol was

modified for GC-rich *M. smegmatis* transcripts by extending the first-strand synthesis time up to 30 min and increasing the temperature for synthesis to 65°C. Subsequently, the resulting cDNA was diluted (1:5) and used for quantitative PCRs performed with PowerUp SYBR Green Master Mix (Applied Biosystems). The relative level of a particular transcript was quantified using the comparative  $\Delta\Delta C_t$  method and the *sigA* gene as the endogenous control (StepOne Plus Real-time PCR system, Applied Biosystems). The optimized oligonucleotides used in this study were synthesized by Genomed (Table S2).

### **Homology modelling and analysis**

The homology models were predicted using the multimer mode in a standalone version of AlphaFold (Evans et al., 2022). Structures were visualized in ChimeraX (Pettersen et al., 2021).

### **Bibliography**

Evans, R., O'Neill, M., Pritzel, A., Antropova, N., Senior, A., Green, T., et al. (2022). Protein complex prediction with AlphaFold-Multimer. *bioRxiv*, 2021.10.04.463034.

doi:10.1101/2021.10.04.463034.

Pettersen, E. F., Goddard, T. D., Huang, C. C., Meng, E. C., Couch, G. S., Croll, T. I., et al. (2021). UCSF ChimeraX: Structure visualization for researchers, educators, and developers. *Protein Sci.* 30, 70–82. doi:10.1002/pro.3943.

Płociński, P., Macios, M., Houghton, J., Niemiec, E., Płocińska, R., Brzostek, A., et al. (2019). Proteomic and transcriptomic experiments reveal an essential role of RNA degradosome complexes in shaping the transcriptome of *Mycobacterium tuberculosis*. *Nucleic Acids Res.* 47, 5892–5905.

doi:10.1093/nar/gkz251.
