# Supplementary material for: The interplay between the polar growth determinant DivIVA, the segregation protein ParA, and their novel interaction partner PapM controls the Mycobacterium smegmatis cell cycle by modulation of DivIVA subcellular distribution
Source: PubMed Central journal article supplement (PMC10714820; doi:10.1128/spectrum.01752-23), 2023-11-15
Supplement: spectrum.01752-23-s0003.pdf [file spectrum.01752-23-s0003.pdf]

1 **Matrusiak I. et al. - movie legends**

2 **Movie 1. papM deletion alters EGFP-ParA fluorescence dynamics - the time-lapse analysis.** The series  
3 of time-lapse images (taken at 10 min intervals) showing representative *M. smegmatis* cells producing  
4 **(A)** EGFP-ParA in the control strain ( $\Delta parA + pMV_{nat} egfp-parA$ ) and **(B)** the  $\Delta papM$  background  
5 ( $\Delta parA \Delta papM + pMV306_{nat} egfp-parA$ ). The images show EGFP-ParA fluorescence (green) merged with  
6 a brightfield image (magenta). The cell division is marked with a yellow arrowhead, the appearance of  
7 EGFP-ParA at the site of cell division with white arrowheads. Scale bar 5  $\mu m$ .

8 **Movie 2. The mCherry-DivIVA redistribution during the cell cycle is affected by parA and papM**  
9 **deletion.** The series of time-lapse images (taken at 10 min intervals) showing representative  
10 *M. smegmatis* cells mCherry-DivIVA in the **(A)** wild type (WT) control strain, **(B)**  $\Delta parA$  and **(C)**  $\Delta papM$   
11 strains producing mCherry-DivIVA (apart of the wild type DivIVA). The time of DivIVA appearance in  
12 the mid-cell is marked with red triangle and the time of new poles separation by black triangle.

13

14
