# Supplementary material for: The interplay between the polar growth determinant DivIVA, the segregation protein ParA, and their novel interaction partner PapM controls the Mycobacterium smegmatis cell cycle by modulation of DivIVA subcellular distribution
Source: PubMed Central journal article supplement (PMC10714820; doi:10.1128/spectrum.01752-23), 2023-11-15
Supplement: spectrum.01752-23-s0004.pdf [file spectrum.01752-23-s0004.pdf]

Matusiak I. et al. supplemental material

Table S1. Constructs used in the study

| Constructs                                   | Relevant genotype                                                                                                                                  | Source                           |
|----------------------------------------------|----------------------------------------------------------------------------------------------------------------------------------------------------|----------------------------------|
| Constructs used in <i>E. coli</i> BTH system |                                                                                                                                                    |                                  |
| pUT18C                                       | pUC replicon, p <sub>lac</sub> promoter, ampicillin resistance, IPTG-inducible, T18 fragment of <i>cyaA</i> gene (encoding 225 to 399 amino acids) | (Karimova et al., 1998)          |
| pKT25                                        | P15A replicon, p <sub>lac</sub> promoter, kanamycin resistance, IPTG-inducible T25 fragment of <i>cyaA</i> gene (encoding 1- 224 amino acids)      | (Karimova et al., 1998)          |
| pKT25 <i>parA</i>                            | pKT25 derivative containing <i>M. smegmatis parA</i> gene                                                                                          | (Ginda et al., 2013)             |
| pKT25 <i>parAT3A</i>                         | pKT25 derivative containing <i>M. smegmatis parAT3A</i> gene                                                                                       | (Pióro et al., 2019)             |
| pKT25 <i>parAK44A</i>                        | pKT25 derivative containing <i>M. smegmatis parAK44A</i> gene                                                                                      | (Pióro et al., 2019)             |
| pKT25 <i>parAD68A</i>                        | pKT25 derivative containing <i>M. smegmatis parAD68A</i> gene                                                                                      | (Pióro et al., 2019)             |
| pKT25 <i>parAG40V</i>                        | pKT25 derivative containing <i>M. smegmatis parAG40V</i> gene                                                                                      | (Pióro et al., 2019)             |
| pKT25 <i>parAR219E</i>                       | pKT25 derivative containing <i>M. smegmatis parAR219E</i> gene                                                                                     | (Pióro et al., 2019)             |
| pKT25 <i>parB</i>                            | pKT25 derivative containing <i>M. smegmatis parB</i> gene                                                                                          | (Ginda et al., 2013)             |
| pUT18C <i>divIVA</i>                         | pUT18C derivative containing <i>M. smegmatis divIVA</i> gene                                                                                       | (Ginda et al., 2013)             |
| pUT18C <i>divIVA I-II</i>                    | pUT18C derivative containing a fragment of <i>M. smegmatis divIVA</i> gene used for the production of T18C-DivIVAI-II (amino acids 1-72)           | (Ginda et al., 2013)             |
| pUT18C <i>divIVA II-III</i>                  | pUT18C derivative containing a fragment of <i>M. smegmatis divIVA</i> gene used for the production of T18C-DivIVAII - III (amino acids 1-143)      | (Ginda et al., 2013)             |
| pUT18C <i>divIVA III-IV</i>                  | pUT18C derivative containing a fragment of <i>M. smegmatis divIVA</i> gene used for the production of T18C-DivIVAIII - IV (amino acids 68-272)     | (Ginda et al., 2013)             |
| pUT18C <i>divIVA IV</i>                      | pUT18C derivative containing a fragment of <i>M. smegmatis divIVA</i> gene used for the production of T18C-DivIVAIV (amino acids 139-272)          | (Ginda et al., 2013)             |
| pKT25 <i>divIVA</i>                          | pKT25 derivative containing <i>M. smegmatis divIVA</i> gene                                                                                        | (Ginda et al., 2013)             |
| pUT18C <i>msmeg_5597</i>                     | pUT18C derivative containing <i>M. smegmatis msmeg_5597 (papM)</i> gene                                                                            | This study                       |
| pKT25 <i>msmeg_5597</i>                      | pKT25 derivative containing <i>M. smegmatis (msmeg_5597) papM</i> gene                                                                             | This study                       |
| Constructs used for protein purification     |                                                                                                                                                    |                                  |
| pGEX-6P-2                                    | pGEX-6P-2 ampicillin resistance, GST-tag vector                                                                                                    | Lab stock, University of Wrocław |

|                                                                 |                                                                                                                                                                                 |                                  |
|-----------------------------------------------------------------|---------------------------------------------------------------------------------------------------------------------------------------------------------------------------------|----------------------------------|
| pGEX-6P-2 <i>parA</i>                                           | pGEX-6P-2 derivative containing <i>M. smegmatis parA</i> gene                                                                                                                   | (Jakimowicz et al., 2007)        |
| pET28a                                                          | pET28a kanamycin resistance, His-tag vector                                                                                                                                     | Lab stock, University of Wrocław |
| pET28a <i>papM</i>                                              | pET28a derivative containing <i>M. smegmatis papM</i> gene                                                                                                                      | This study                       |
| Constructs used for colocalization microscopy in <i>E. coli</i> |                                                                                                                                                                                 |                                  |
| pETDuet-1                                                       | ampicillin resistance vector, two multiple cloning sites, the pBR322-derived ColE1 replicon, <i>lacI</i> gene                                                                   | Lab stock, University of Wrocław |
| pJP108 <i>divIVA</i> <sub>MS</sub>                              | pJP108 containing <i>icsA507-620-mcherry</i> fused with <i>M. smegmatis divIVA</i> gene                                                                                         | (Pióro et al., 2019)             |
| pETDuet- <i>pknB</i> <sub>KD</sub>                              | pETDuet-1 derivative containing fragment of <i>M. smegmatis pknB</i> gene encoding kinase domain (11-274 aa)                                                                    | This study                       |
| pETDuet- <i>mcherry-divIVA</i>                                  | pETDuet-1 derivative containing <i>icsA507-620-mcherry</i> fused with <i>M. smegmatis divIVA</i> gene                                                                           | This study                       |
| pETDuet- <i>pknB</i> <sub>KD</sub><br><i>mcherry-divIVA</i>     | pETDuet-1 derivative containing fragment of <i>M. smegmatis pknB</i> gene encoding kinase domain (11-274 aa) (MCS1) and <i>divIVA</i> gene fused with <i>mcherry</i> (MCS2)     | This study                       |
| pETDuet- <i>pknB</i> <sub>KD</sub><br><i>mcherry-divIVAT74A</i> | pETDuet-1 derivative containing fragment of <i>M. smegmatis pknB</i> gene encoding kinase domain (11-274 aa) (MCS1) and <i>divIVAT74A</i> gene fused with <i>mcherry</i> (MCS2) | This study                       |
| pETDuet- <i>ics-mcherry</i>                                     | pETDuet-1 derivative containing <i>icsA507-620-mcherry</i>                                                                                                                      | This study                       |
| pACYC-Duet-1                                                    | chloramphenicol resistance vector, two multiple cloning sites, the P15A replicon, <i>lacI</i> gene                                                                              | Lab stock, University of Wrocław |
| pACYC- <i>egfp-parA</i>                                         | pACYCDuet-1 derivative containing <i>egfp</i> gene fused with <i>M. smegmatis parA</i> gene                                                                                     | (Pióro et al., 2019)             |
| pACYC- <i>papM-mT2</i>                                          | pACYCDuet-1 derivative containing <i>M. smegmatis papM</i> gene fused with <i>mturquoise2</i>                                                                                   | This study                       |
| pACYC- <i>papM-mT2; egfp-parA</i>                               | pACYCDuet-1 derivative containing <i>M. smegmatis papM</i> gene fused with <i>mturquoise2</i> (MCS1) and <i>egfp</i> gene fused with <i>M. smegmatis parA</i> gene (MCS2)       | This study                       |
| Constructs used for <i>M. smegmatis</i> modifications           |                                                                                                                                                                                 |                                  |
| p2Nil                                                           | kanamycin resistance, <i>oriE</i> , suicide vector for allelic replacement                                                                                                      | (Parish and Stoker, 2000)        |
| pGOAL                                                           | ampicillin resistance, <i>oriE</i> , selective Pacl cassette with <i>lacZ</i> , <i>sacB</i> and <i>kanR</i> genes                                                               | (Parish and Stoker, 2000)        |
| p2NilΔ <i>papM</i> GOAL                                         | p2Nil derivative for deletion of <i>papM</i> gene                                                                                                                               | This study                       |
| p2Nil <i>sr2-mT2</i> GOAL                                       | p2Nil containing <i>mTurquoise2</i> gene fused with <i>lrr2</i>                                                                                                                 | (Kołodziej et al., 2021)         |
| pMV306p <sub>ami</sub>                                          | pMV306 containing acetamide inducible promoter p <sub>ami</sub>                                                                                                                 | (Ginda et al., 2013)             |
| pMV306p <sub>ami</sub> <i>papM</i>                              | pMV306p <sub>ami</sub> derivative containing <i>M. smegmatis papM</i> gene                                                                                                      | This study                       |

|                                                        |                                                                                                                     |                                  |
|--------------------------------------------------------|---------------------------------------------------------------------------------------------------------------------|----------------------------------|
| pMV <sub>nat</sub> <i>egfp-parA</i>                    | pMV306 <sub>p<sub>ami</sub></sub> derivative containing <i>egfp</i> gene fused with <i>parA</i> gene                | (Ginda et al., 2013)             |
| pMV <sub>nat</sub> <i>PAmcherry-parA</i>               | pMV306 <sub>p<sub>ami</sub></sub> containing <i>PAmcherry</i> gene fused with <i>parA</i> under its native promoter | (Pióro et al., 2019)             |
| pKW08 <sub>p<sub>tet</sub></sub>                       | pKW08 containing tetracycline inducible promoter <i>p<sub>tet</sub></i>                                             | Lab stock, University of Wrocław |
| pKW08 <sub>p<sub>tet</sub></sub> <i>mcherry-divIVA</i> | pKW08 <sub>p<sub>tet</sub></sub> derivative containing <i>mcherry</i> gene fused with <i>divIVA</i>                 | This study                       |

Ginda, K., Bezulska, M., Ziólkiewicz, M., Dziadek, J., Zakrzewska-Czerwińska, J., and Jakimowicz, D.

(2013). ParA of *Mycobacterium smegmatis* co-ordinates chromosome segregation with the cell cycle and interacts with the polar growth determinant DivIVA. *Mol. Microbiol.* 87, 998–1012. doi:10.1111/mmi.12146.

Jakimowicz, D., Brzostek, A., Rumijowska-Galewicz, A., Zydek, P., Dotzblasz, A., Smulczyk-

Krawczynszyn, A., et al. (2007). Characterization of the mycobacterial chromosome segregation protein ParB and identification of its target in *Mycobacterium smegmatis*. *Microbiology* 153, 4050–4060. doi:10.1099/mic.0.2007/011619-0.

Karimova, G., Pidoux, J., Ullmann, A., and Ladant, D. (1998). A bacterial two-hybrid system based on a reconstituted signal transduction pathway. *Proc. Natl. Acad. Sci.* 95, 5752–5756.

doi:10.1073/pnas.95.10.5752.

Kołodziej, M., Trojanowski, D., Bury, K., Hołówka, J., Matysik, W., Kąkolewska, H., et al. (2021). Lsr2, a nucleoid-associated protein influencing mycobacterial cell cycle. *Sci. Rep.* 11, 1–12.

doi:10.1038/s41598-021-82295-0.

Parish, T., and Stoker, N. G. (2000). Use of a flexible cassette method to generate a double unmarked *Mycobacterium tuberculosis* tlyA plcABC mutant by gene replacement. *Microbiology* 146 ( Pt 8, 1969–75.

Pióro, M., Małecki, T., Portas, M., Magierowska, I., Trojanowski, D., Sherratt, D., et al. (2019).

Competition between DivIVA and the nucleoid for ParA binding promotes segrosome separation and modulates mycobacterial cell elongation. *Mol. Microbiol.* 111, 204–220.

doi:10.1111/mmi.14149.
