# Supplementary material for: The interplay between the polar growth determinant DivIVA, the segregation protein ParA, and their novel interaction partner PapM controls the Mycobacterium smegmatis cell cycle by modulation of DivIVA subcellular distribution
Source: PubMed Central journal article supplement (PMC10714820; doi:10.1128/spectrum.01752-23), 2023-11-15
Supplement: spectrum.01752-23-s0005.pdf [file spectrum.01752-23-s0005.pdf]

Matusiak I. et al. supplemental material

Table S2. Strains used in the study

| <i>E. coli</i> strains      |                                                                                                                                                                                                                                                                            |                                  |
|-----------------------------|----------------------------------------------------------------------------------------------------------------------------------------------------------------------------------------------------------------------------------------------------------------------------|----------------------------------|
| DH5 $\alpha$                | <i>F</i> <sup>-</sup> , <i>endA1</i> , <i>glnV44</i> , <i>thi-1</i> , <i>recA1</i> , <i>relA1</i> , <i>gyrA96</i> , <i>deoR</i> , <i>nupG</i> $\Phi$ 80 <i>dlacZ</i> $\Delta$ <i>M15</i> $\Delta$ ( <i>lacZYA-argF</i> ) U169, <i>hsdR17</i> ( <i>rKmK+</i> ), $\lambda$ - | Lab stock, University of Wroclaw |
| BTH101                      | <i>F</i> <sup>-</sup> , <i>cyo-99</i> , <i>araD139</i> , <i>galE15</i> , <i>galK16</i> , <i>rpsL1</i> ( <i>Str</i> <sup>r</sup> ), <i>hsdR2</i> , <i>mcrA1</i> , <i>mcrB1</i>                                                                                              | Lab stock, University of Wroclaw |
| BL21(DE3)                   | <i>F</i> <sup>-</sup> , <i>ompT</i> , <i>gal</i> , <i>dcm</i> , <i>lon</i> , <i>hsdSB</i> ( <i>rB-mB-</i> ), $\lambda$ (DE3)                                                                                                                                               | Lab stock, University of Wroclaw |
| <i>M. smegmatis</i> strains |                                                                                                                                                                                                                                                                            |                                  |
| WT                          | <i>M. smegmatis</i> mc <sup>2</sup> 155                                                                                                                                                                                                                                    | lab stock, University of Wroclaw |
| KG22                        | <i>M. smegmatis</i> mc <sup>2</sup> 155 $\Delta$ <i>parA</i>                                                                                                                                                                                                               | (Ginda et al., 2013)             |
| MP24                        | <i>M. smegmatis</i> mc <sup>2</sup> 155, <i>attBL5</i> ::pMV306p <sub>ami</sub> $\Phi$                                                                                                                                                                                     | (Pióro et al., 2022)             |
| KG56                        | <i>M. smegmatis</i> mc <sup>2</sup> 155 $\Delta$ <i>parA</i> , <i>attBL5</i> ::pMV306p <sub>nat</sub> <i>egfp-parA</i>                                                                                                                                                     | (Ginda et al., 2013)             |
| DJMP01                      | <i>M. smegmatis</i> mc <sup>2</sup> 155 $\Delta$ <i>parA</i> , <i>attBL5</i> ::pMV306p <sub>nat</sub> <i>PAmcherry-parA</i>                                                                                                                                                | (Pióro et al., 2019)             |
| IM01                        | <i>M. smegmatis</i> mc <sup>2</sup> 155 $\Delta$ <i>papM</i>                                                                                                                                                                                                               | This study                       |
| IM02                        | <i>M. smegmatis</i> mc <sup>2</sup> 155 $\Delta$ <i>parA</i> , $\Delta$ <i>papM</i>                                                                                                                                                                                        | This study                       |
| IM11                        | <i>M. smegmatis</i> mc <sup>2</sup> 155 $\Delta$ <i>parA</i> , <i>attBL5</i> ::pMVp <sub>ami</sub> $\Phi$                                                                                                                                                                  | This study                       |
| IM12                        | <i>M. smegmatis</i> mc <sup>2</sup> <i>attBL5</i> ::pMVp <sub>ami</sub> <i>papM</i>                                                                                                                                                                                        | This study                       |
| IM13                        | <i>M. smegmatis</i> mc <sup>2</sup> 155 $\Delta$ <i>parA</i> , <i>attBL5</i> ::pMVp <sub>ami</sub> <i>papM</i>                                                                                                                                                             | This study                       |
| IM14                        | <i>M. smegmatis</i> mc <sup>2</sup> 155 $\Delta$ <i>parA</i> , $\Delta$ <i>papM</i> , <i>attBL5</i> ::pMVp <sub>nat</sub> <i>egfp-parA</i>                                                                                                                                 | This study                       |
| IM15                        | <i>M. smegmatis</i> mc <sup>2</sup> 155 $\Delta$ <i>parA</i> , $\Delta$ <i>papM</i> , <i>attBL5</i> ::pMV306p <sub>nat</sub> <i>PAmcherry-parA</i>                                                                                                                         | This study                       |
| IM16                        | <i>M. smegmatis</i> mc <sup>2</sup> <i>attBL5</i> ::pKW08p <sub>tet</sub> <i>mcherry-divIVA</i>                                                                                                                                                                            | This study                       |
| IM17                        | <i>M. smegmatis</i> mc <sup>2</sup> $\Delta$ <i>papM</i> , <i>attBL5</i> ::pKW08p <sub>tet</sub> <i>mcherry-divIVA</i>                                                                                                                                                     | This study                       |
| IM18                        | <i>M. smegmatis</i> mc <sup>2</sup> $\Delta$ <i>parA</i> , <i>attBL5</i> ::pKW08p <sub>tet</sub> <i>mcherry-divIVA</i>                                                                                                                                                     | This study                       |
| IM19                        | <i>M. smegmatis</i> mc <sup>2</sup> $\Delta$ <i>parA</i> , $\Delta$ <i>papM</i> , <i>attBL5</i> ::pKW08p <sub>tet</sub> <i>mcherry-divIVA</i>                                                                                                                              | This study                       |
| IMPW1                       | <i>M. smegmatis</i> mc <sup>2</sup> $\Delta$ <i>parA</i> , $\Delta$ <i>papM</i> , <i>attBL5</i> ::pMVp <sub>ami</sub> <i>papM</i>                                                                                                                                          | This study                       |
