# Supplementary material for: The interplay between the polar growth determinant DivIVA, the segregation protein ParA, and their novel interaction partner PapM controls the Mycobacterium smegmatis cell cycle by modulation of DivIVA subcellular distribution
Source: PubMed Central journal article supplement (PMC10714820; doi:10.1128/spectrum.01752-23), 2023-11-15
Supplement: spectrum.01752-23-s0006.pdf [file spectrum.01752-23-s0006.pdf]

Matusiak I. et al. supplemental material

Table S3. Oligonucleotides used in this study

| Name                     | Sequence 5' to 3'                                       |
|--------------------------|---------------------------------------------------------|
| PknB_Ms_Fw_HindIII       | <b>CAAGCTT</b> gATGAGGTCGGCGCGCATC                      |
| PknB_Ms_Rv_EcoRI         | CT <b>GAATTC</b> ATACGAACTCGGTGAGATCCTC                 |
| Cherry_Fw_Nde            | <b>CCCATATGGT</b> GAGCAAGGGCGAGGAGG                     |
| Div_revSnaBI             | <b>CCTACGTATCAGTTGTTGCCGCGGTTGAACTGG</b>                |
| Ics_Fw_NdeI              | <b>CATATGAGTACTATTCTGGCAGATAATCTCAGCCATC</b>            |
| Cherry_rvSnaBI           | <b>CCTACGTATTACTTGTACAGCTCGTCCATGCCGC</b>               |
| 5597_Fw_NcoI             | AACTTTAATAAGGAGATATA <b>CCATGGG</b> TGGGACGTCATCGCGAGTT |
| 5597_linker_Rv           | GCCCGCCGCCGAGCCCGCCGAGCCAGGCGCTTGC GCGTGGCCTTCCCC       |
| linker_mt2_Fw            | AAGGCCACGCGCAAGCGCCTGGCTCGGCGGGCTCGGCGGCGGGCT           |
| mt2_Rv_EcoRI             | CCTGCAGGCGCGCCGAGCTC <b>GAATTC</b> CACTTGTACAGCTCGTCCA  |
| MSMEG_5597_XbaI_BamHI_Fw | <b>CCTCTAGAGGGATCC</b> ATGGGACGTCATCGCGAGTT             |
| MSMEG_5597_KpnI_EcoRI_Rv | <b>CCGGTACCCGGAATTC</b> GCGCTTGC GCGTGGCCTT             |
| Msmeg5597_F1_HindIII_Fw  | <b>CAAGCTT</b> TATGAAATCGGCCGTTGG                       |
| Msmeg5597_F1_BamHI_Rv    | <b>CGGATCC</b> ACGACCGGTAATAAACTACC                     |
| Msmeg5597_F2_BamHI_Fw    | <b>CGGATCCT</b> GGGAGTTGGGCGGTACG                       |
| Msmeg5597_F2_PacI_Rv     | <b>CTTAATTAAG</b> CCCTGTCTGCCAGCTTG                     |
| 5597_pami_XbaI_Fw        | <b>CTCTCTAGAGT</b> GGGACGTCATCGCGAGTTC                  |
| 5597_pami_KpnI_Rv        | CTT <b>GGTACCT</b> CAGCGCTTGC GCGTGGC                   |
| RT-PCR3_Fw               | ATCGCGAGTTCGATGTGGAC                                    |
| RT-PCR3_Rv               | TACCCTTTGC GCCAGAACAC                                   |
| pKW08F2                  | GGTGGTGAGTCATAGTTGC                                     |
| pKW08RV2                 | GGATTACACATGACCAACTTC                                   |
| DivIVA_Ms_Ala_Fw         | GCGTCGTACAGGCGGCATCGTCGATCCCCG                          |
| DivIVA_Ms_Ala_Rv         | GCGGGATCGACGATGCCGCTGTGACGACGC                          |

\*Boldface type indicates the restriction site.
